# Supplementary material for: Flower Extracts as Multifunctional Dyes in the Cosmetics Industry
Source: MDPI journal article supplement (doi:10.3390/molecules27030922), 2022-01-29
Supplement: s1 [file s1]

# Flower extracts as multifunctional dyes in the cosmetics industry

## Supplementary material

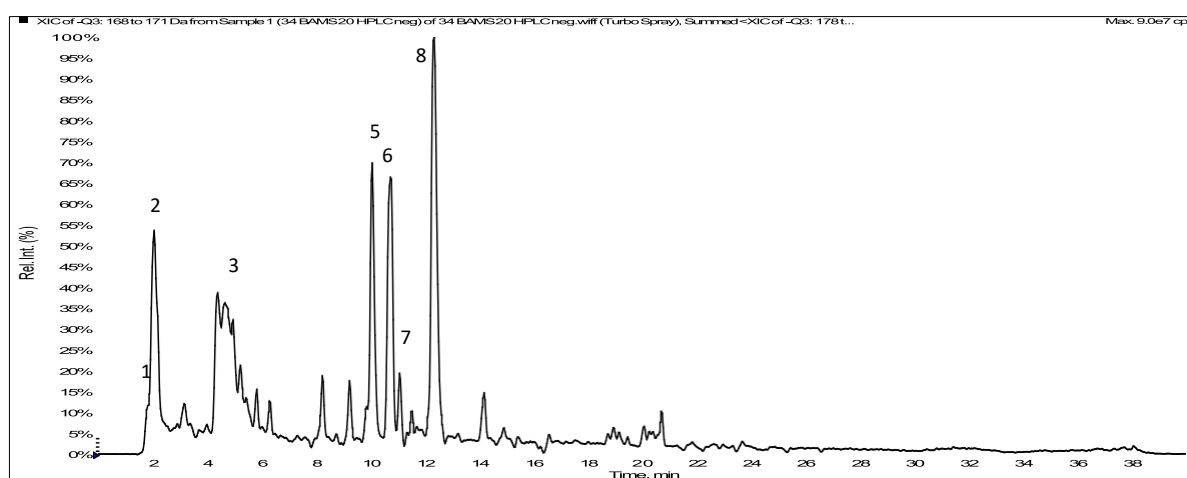

Figure S1. Extracted ion chromatograms (XIC) obtained for PRE.

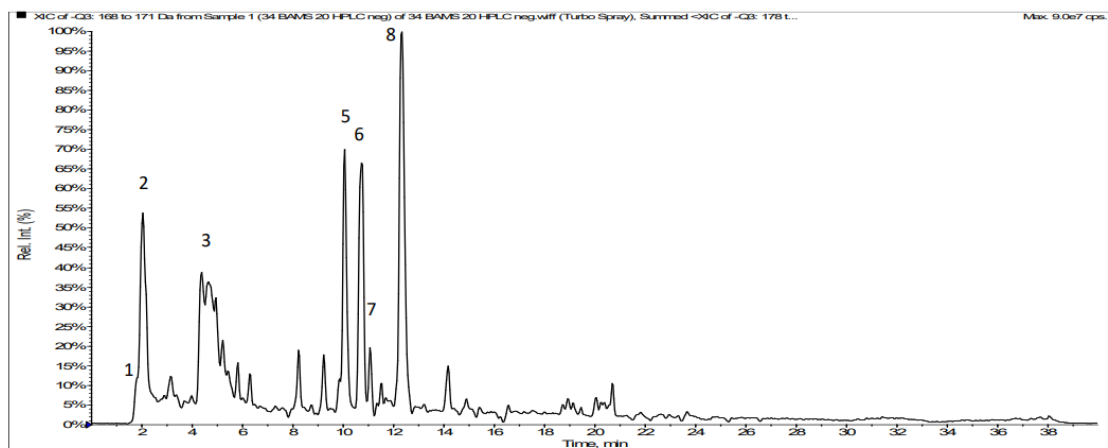

Figure S2. Extracted ion chromatograms (XIC) obtained for KTE.

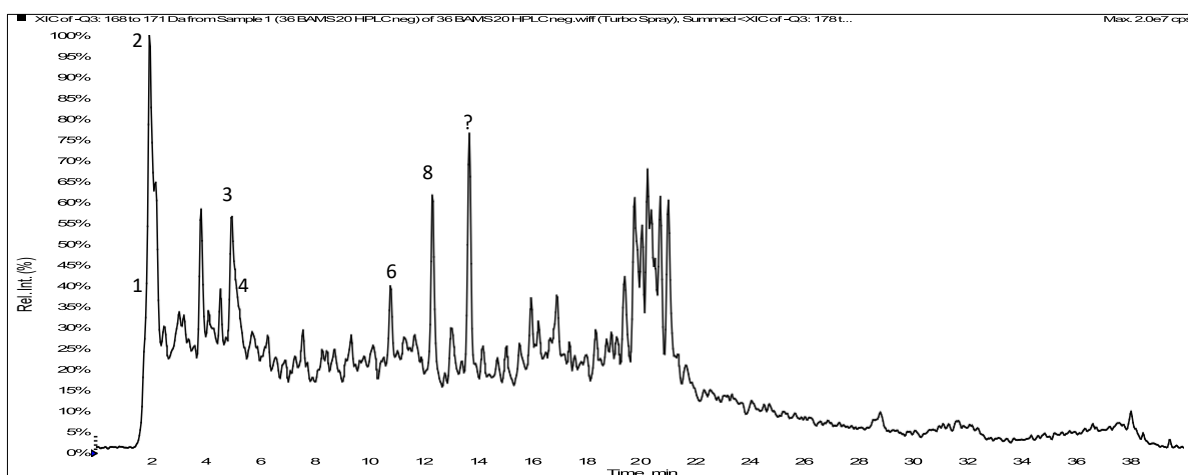

Figure S3. Extracted ion chromatograms (XIC) obtained for GGE.

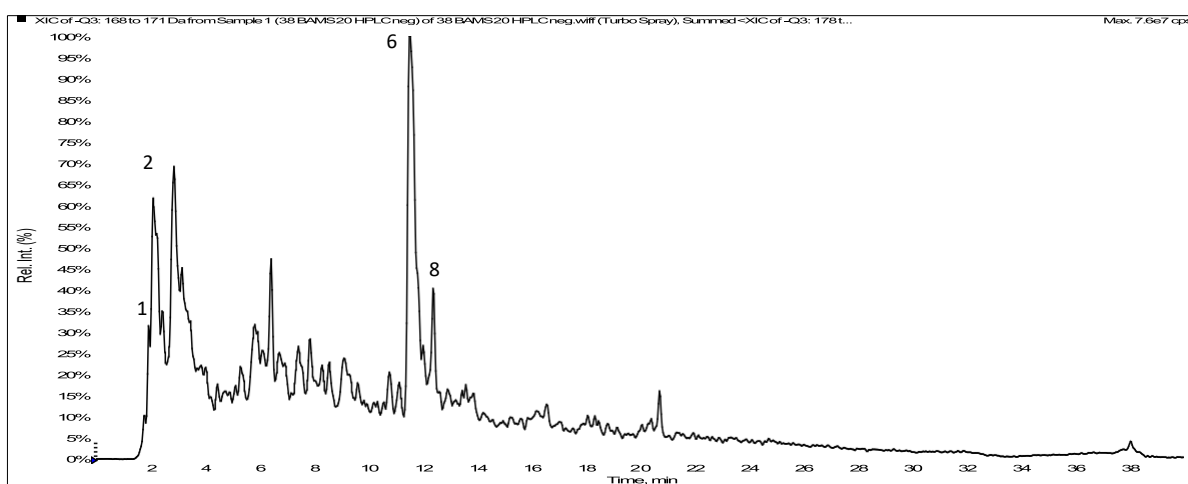

Figure S4. Extracted ion chromatograms (XIC) obtained for PGE.

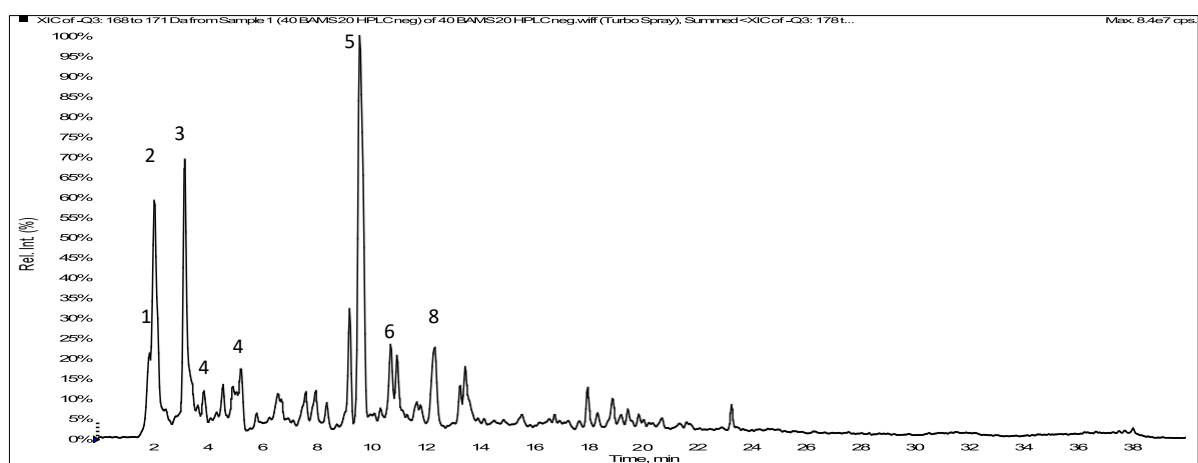

Figure S5. Extracted ion chromatograms (XIC) obtained for CTE.

Table S1. Polyphenols detected using HPLC-ESI-MS

| No. | Retention time (min) | Molar mass (Da) | Precursor ion m/z      | Identification         |
|-----|----------------------|-----------------|------------------------|------------------------|
| 1   | 1.9                  | 180.2           | 179 [M-H] <sup>-</sup> | Caffeic acid           |
| 2   | 2.0                  | 192.2           | 191 [M-H] <sup>-</sup> | Quinic acid            |
| 3   | 5                    | 170.1           | 169 [M-H] <sup>-</sup> | Gallic acid            |
| 4   | 4.0<br>5.2<br>5.8    | 354.3           | 353 [M-H] <sup>-</sup> | Caffeoylquinic acids   |
| 5   | 10.7                 | 464.1           | 463                    | Isoquercetin           |
| 6   | 10.8                 | 302.2           | 301 [M-H] <sup>-</sup> | Quercetin              |
| 7   | 10.7                 | 610.5           | 609 [M-H] <sup>-</sup> | Rutin                  |
| 8   | 12.5                 | 448.3           | 447 [M-H] <sup>-</sup> | Kaempferol-O-glucoside |
